# Supplementary material for: Rational design of Cu–Co thiospinel ternary sheet arrays for highly efficient electrocatalytic water splitting
Source: Royal Society of Chemistry journal article supplement (doi:10.1039/c9ta12104h), 2019-12-17
Supplement: c9ta12104h1.pdf [file c9ta12104h1.pdf]

## Supplementary Information

### **Rational design of Cu-Co thiospinel ternary sheet arrays for high efficient electrocatalytic water splitting**

Nan Zang<sup>a</sup>, Zexing Wu<sup>c</sup>, Jie Wang<sup>b,\*</sup>, Wei Jin<sup>a,\*</sup>

<sup>a</sup> School of Chemical and Material Engineering, Jiangnan University, Wuxi, 214122, China.

<sup>b</sup> College of Chemistry and Pharmaceutical Sciences, Qingdao Agricultural University, Qingdao, 266109, China.

<sup>c</sup> State Key Laboratory Base of Eco-chemical Engineering, College of Chemistry and Molecular Engineering, Qingdao University of Science & Technology, 53 Zhengzhou Road, Qingdao, 266042, China.

\* Corresponding author.

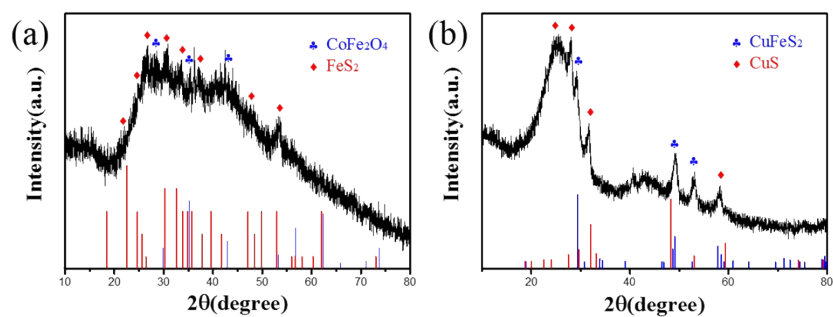

**Fig. S1** The XRD patterns of FeS<sub>2</sub>/CoFe<sub>2</sub>O<sub>4</sub> (a) and CuS/CuFeS<sub>2</sub> (b) samples.

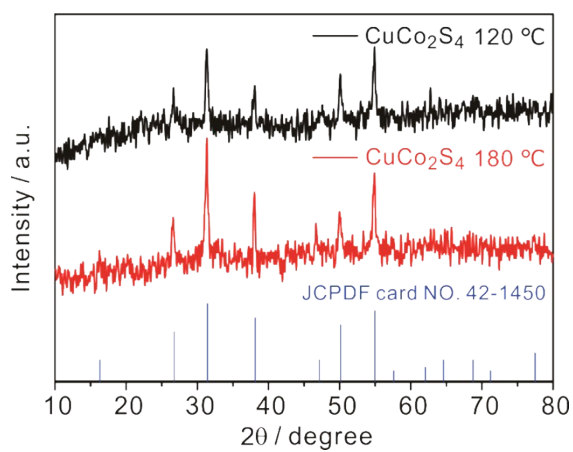

**Fig. S2** The XRD patterns of CuCo<sub>2</sub>S<sub>4</sub> TSA obtained at 120 °C and 180 °C.

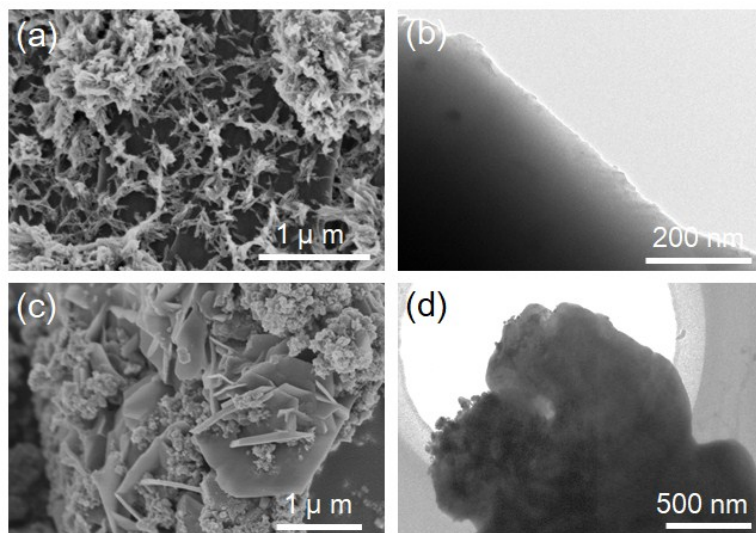

**Fig. S3** The SEM (a) and TEM (b) images of  $\text{CuCo}_2\text{S}_4$  TSA obtained at 120 °C; the SEM (c) and TEM (d) images of  $\text{CuCo}_2\text{S}_4$  TSA obtained at 180 °C.

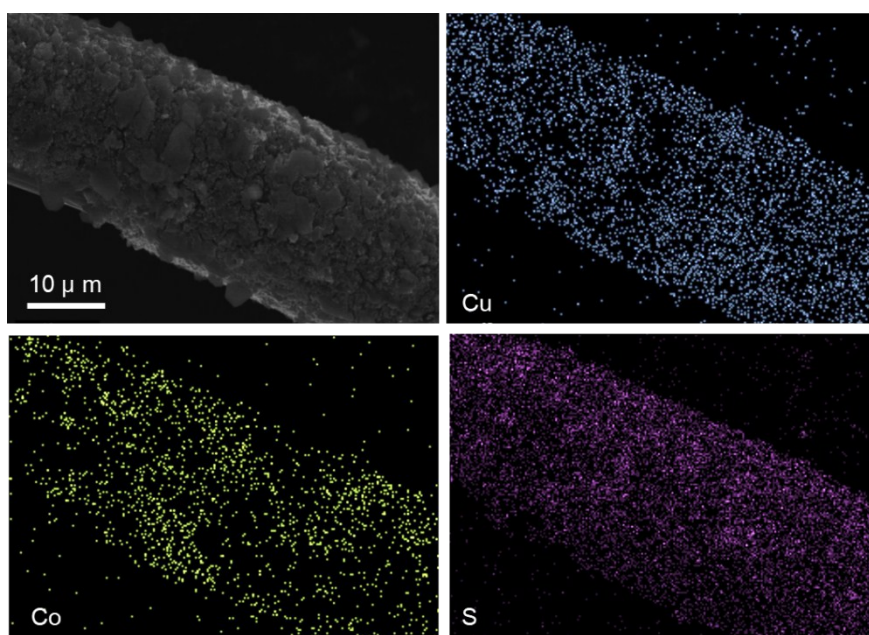

**Fig. S4** SEM image of ternary  $\text{CuCo}_2\text{S}_4$  TSA and the corresponding EDS mapping of Cu, Co, S elemental distribution.

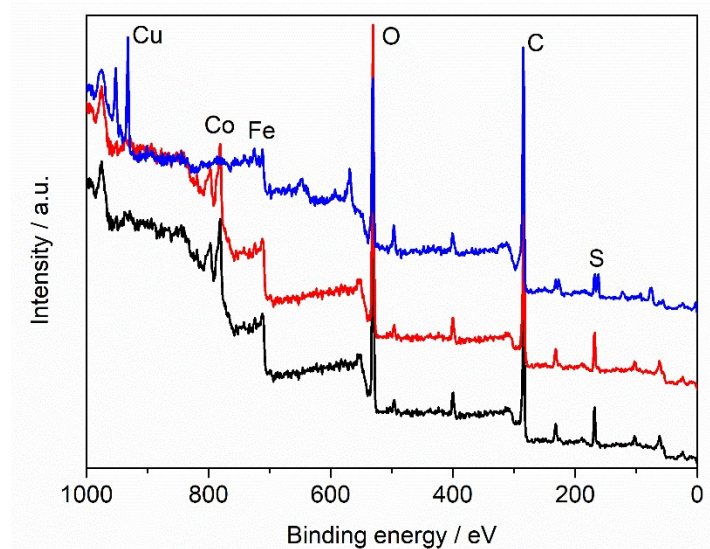

**Fig. S5** The full range XPS spectra of CuCo<sub>2</sub>S<sub>4</sub> TSA, FeS<sub>2</sub>/CoFe<sub>2</sub>O<sub>4</sub> and CuS/CuFeS<sub>2</sub> samples.

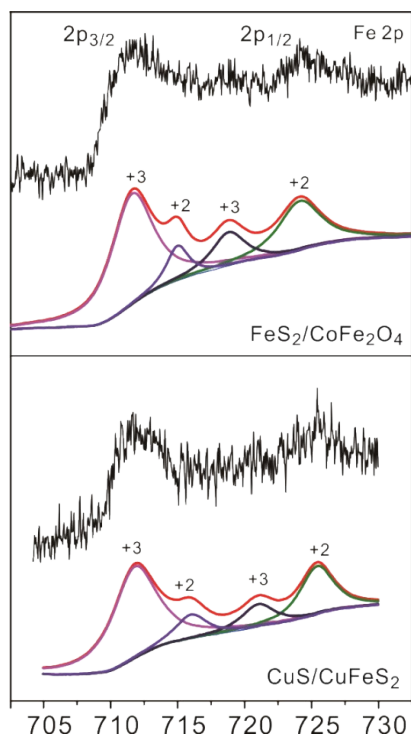

**Fig. S6** High-resolution XPS spectra of the Fe 2p for FeS<sub>2</sub>/CoFe<sub>2</sub>O<sub>4</sub> and CuS/CuFeS<sub>2</sub> samples.

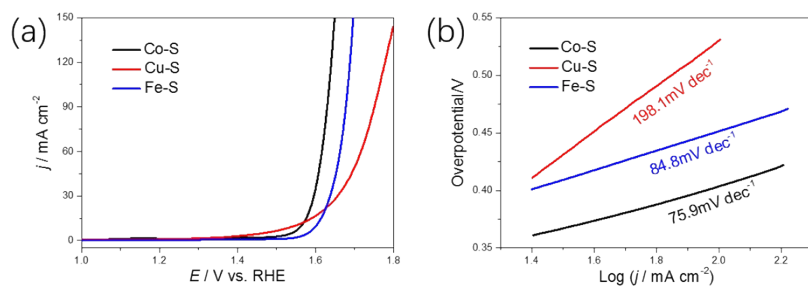

**Fig. S7** (a) OER polarization curves of Co-S, Cu-S and Fe-S and the corresponding Tafel plots (b).

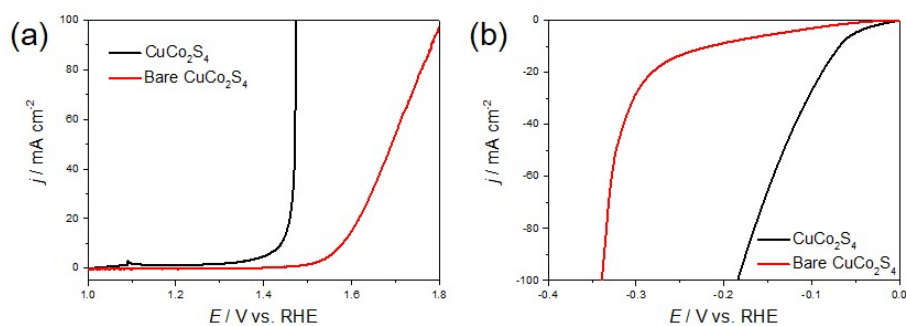

**Fig. S8** OER (a) and HER (b) polarization curves of  $\text{CuCo}_2\text{S}_4$  TSA and  $\text{CuCo}_2\text{S}_4$  without carbon felt.

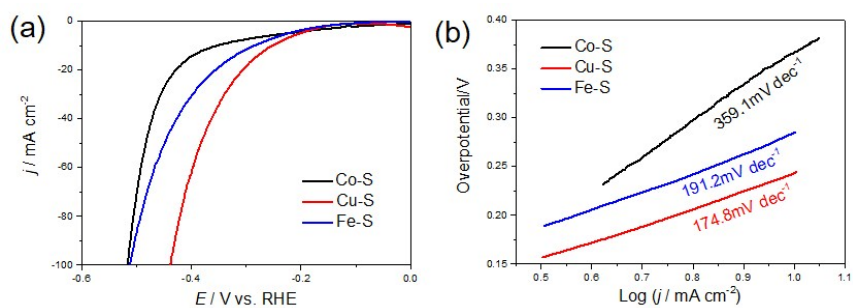

**Fig. S9** (a) HER polarization curves of Co-S, Cu-S and Fe-S and the corresponding Tafel plots (b).

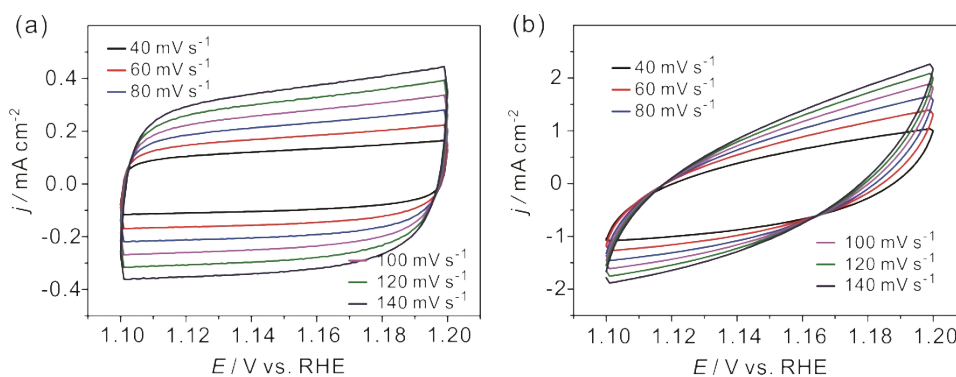

**Fig. S10** Cyclic voltammograms of (a) CuS/CuFeS<sub>2</sub> and (b) FeS<sub>2</sub>/CoFe<sub>2</sub>O<sub>4</sub> with a potential window from 1.1 to 1.2 V at different scan rates in 1.0 M KOH.

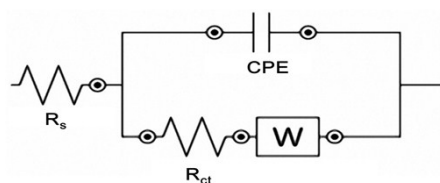

**Fig. S11** Electrical equivalent circuit models for fitting the EIS response on the binary electrodes, where  $R_s$  is the solution resistance,  $R_{ct}$  represents the charge transfer resistance.

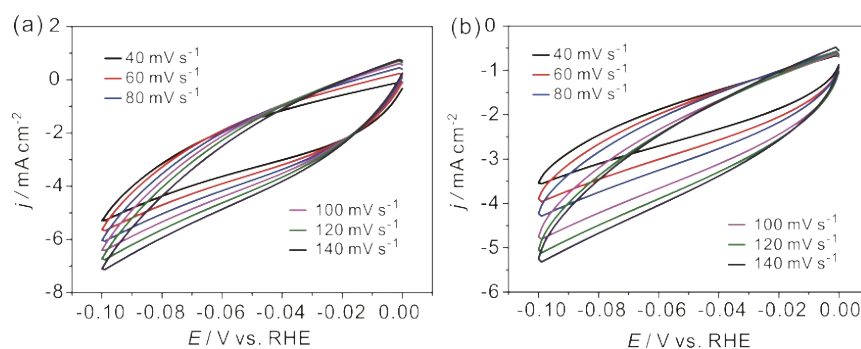

**Fig. S12** Cyclic voltammograms of (a) CuS/CuFeS<sub>2</sub> and (b) FeS<sub>2</sub>/CoFe<sub>2</sub>O<sub>4</sub> with a potential window from -0.1 to 0 V at different scan rates in 1.0 M KOH.

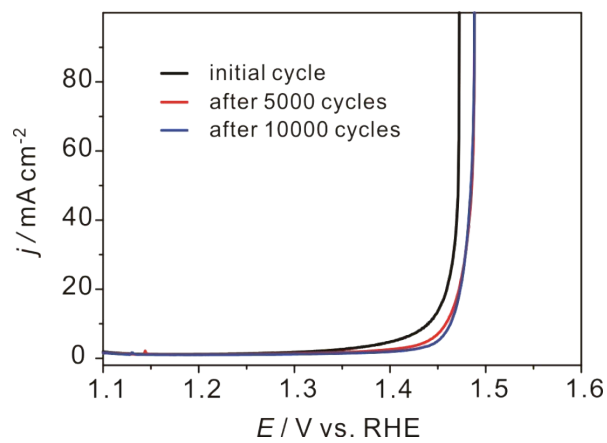

**Fig. S13** LSV curves of  $\text{CuCo}_2\text{S}_4$  nanoarrays electrode at the initial potential cycle and after 5000 and 10000 cycles.

**Table S1.** Comparative electrochemical OER performances of different electrocatalytic materials in alkaline medium.

| Catalysts                                          | Electrolyte | Overpotential (mV)<br>@ 10 mA cm <sup>-2</sup> | Tafel slope<br>(mV dec <sup>-1</sup> ) | Ref       |
|----------------------------------------------------|-------------|------------------------------------------------|----------------------------------------|-----------|
| CuCo <sub>2</sub> S <sub>4</sub>                   | 1.0 M KOH   | 210                                            | 43.8                                   | This work |
| CuS                                                | 1.0 M KOH   | 330                                            | 75.9                                   | This work |
| CuCo <sub>2</sub> S <sub>4</sub>                   | 1.0 M KOH   | 310                                            | 86                                     | 1         |
| Co@Co <sub>9</sub> S <sub>8</sub> -180             | 1.0 M KOH   | 350                                            | 55                                     | 2         |
| NiCo LDH nanosheets                                | 1.0 M KOH   | 367                                            | 40                                     | 3         |
| CoS <sub>8</sub> @MoS <sub>2</sub> /CNFs           | 1.0 M KOH   | 430                                            | 61                                     | 4         |
| CoMn-LDH                                           | 1.0 M KOH   | 324                                            | 43                                     | 5         |
| Zn <sub>0.3</sub> Co <sub>2.7</sub> O <sub>4</sub> | 1.0 M KOH   | 389                                            | 61.57                                  | 6         |
| NiCo <sub>2</sub> S <sub>4</sub> NW/NF             | 1.0 M KOH   | 260                                            | 40.1                                   | 7         |
| A-CoS <sub>4.6</sub> O <sub>0.6</sub> PNCs         | 1.0 M KOH   | 290                                            | 67                                     | 8         |
| Co <sub>9</sub> S <sub>8</sub> @MoS <sub>2</sub>   | 1.0 M KOH   | 340                                            | 49                                     | 9         |
| TiO <sub>2</sub> @Co <sub>9</sub> S <sub>8</sub>   | 1.0 M KOH   | 240                                            | 55                                     | 10        |
| FeNi <sub>2</sub> S <sub>4</sub> /GA               | 1.0 M KOH   | 273                                            | 66                                     | 11        |
| Co <sub>9</sub> S <sub>8</sub> /CNT/carbon cloth   | 0.1 M KOH   | 321                                            | 58                                     | 12        |
| CP/CTs/CoS                                         | 1.0 M KOH   | 306                                            | 72                                     | 13        |
| Ni <sub>3</sub> S <sub>2</sub> /NF                 | 1.0 M KOH   | 260                                            | /                                      | 14        |



**Table S2.** Comparative electrochemical HER performances of different electrocatalytic materials in alkaline medium.

| Catalysts                                                            | Electrolyte                         | Overpotential<br>(mV)<br>@ 10 mA cm <sup>-2</sup> | Tafel<br>slope<br>(mV dec <sup>-1</sup> ) | Ref          |
|----------------------------------------------------------------------|-------------------------------------|---------------------------------------------------|-------------------------------------------|--------------|
| CuCo <sub>2</sub> S <sub>4</sub>                                     | 1.0 M KOH                           | 69                                                | 55.4                                      | This<br>work |
| FeS <sub>2</sub> @C                                                  | 1.0 M KOH                           | 195                                               | 127                                       | 15           |
| Nb <sub>2</sub> Se <sub>9</sub> 3                                    | 0.5M H <sub>2</sub> SO <sub>4</sub> | 160                                               | 63.7                                      | 16           |
| V-Ni <sub>2</sub> P NSAs/CC                                          | 1.0 M KOH                           | 85                                                | 95                                        | 17           |
| Al-Ni <sub>2</sub> P/TM                                              | 1.0 M KOH                           | 129                                               | 98                                        | 18           |
| 3% CoS <sub>2</sub> -7% CuS                                          | 1.0 M KOH                           | 85                                                | 46                                        | 19           |
| NiCo <sub>2</sub> S <sub>4</sub> /Ni <sub>3</sub> S <sub>2</sub> /Ni | 1.0 M KOH                           | 119                                               | 105.2                                     | 20           |
| NiCo <sub>2</sub> S <sub>4</sub> /CC                                 | 1.0 M KOH                           | 263                                               | 141                                       | 21           |
| CoS <sub>2</sub> HNSs                                                | 1.0 M KOH                           | 290                                               | 100                                       | 22           |
| Ni <sub>3</sub> FeN/carbon cloth                                     | 1.0 M KOH                           | 105                                               | 61                                        | 23           |
| MoS <sub>2</sub> -Ni <sub>3</sub> S <sub>2</sub>                     | 1.0 M KOH                           | 98                                                | 61                                        | 24           |
| Heteronanorod/NF                                                     |                                     |                                                   |                                           |              |
| CoP nanowire/carbon cloth                                            | 1.0 M KOH                           | 110                                               | 129                                       | 25           |
| Zn-Co-S/CFP                                                          | 1.0 M KOH                           | 234                                               | 109                                       | 26           |

**Table S3.** Comparative electrochemical overall water splitting performances of different electrocatalytic materials in alkaline medium.

| Catalysts                                      | Electrolyte | Overall voltage (V)<br>@ 10 mA cm <sup>-2</sup> | Ref       |
|------------------------------------------------|-------------|-------------------------------------------------|-----------|
| CuCo <sub>2</sub> S <sub>4</sub>               | 1.0 M KOH   | 1.48                                            | This work |
| NiCo <sub>2</sub> S <sub>4</sub> @NiFe LDH/ NF | 1.0 M KOH   | 1.6                                             | 27        |
| EG/Co <sub>0.85</sub> Se/NiFe LDH              | 1.0 M KOH   | 1.67                                            | 28        |
| Ni <sub>2</sub> P                              | 1.0 M KOH   | 1.63                                            | 29        |
| CoFe LDH-F                                     | 1.0 M KOH   | 1.63                                            | 30        |
| Ni <sub>2.5</sub> Co <sub>0.5</sub> Fe/NF      | 1.0 M KOH   | 1.62                                            | 31        |
| NiCoFe LTH/CC                                  | 1.0 M KOH   | 1.55                                            | 32        |
| NiS/NF                                         | 1.0 M KOH   | 1.64                                            | 33        |
| Ni <sub>3</sub> Se <sub>2</sub>                | 1.0 M KOH   | 1.65                                            | 34        |
| CoMnO@CN                                       | 1.0 M KOH   | 1.8                                             | 35        |
| NiFe LDH/NiO/Ni-CNT                            | 1.0 M KOH   | 1.5                                             | 36        |
| NiFeOx                                         | 1.0 M KOH   | 1.7                                             | 37        |

### Calculations:

Exchange current density ( $i_{ex}$ ) =  $RT/nFA\Theta$

Where, R is the universal gas constant (8.314 J K<sup>-1</sup> mol<sup>-1</sup>), T reaction temperature (298 K), n is the number of electrons, F is Faraday constant (96485 C mol<sup>-1</sup>),  $\Theta$  is resistance (calculated from EIS), and A is area (1 cm<sup>2</sup>).

**Table S4**  $i_{ex}$  values for different electrocatalytic materials.

| Catalysts                                          | OER                 | HER                 |
|----------------------------------------------------|---------------------|---------------------|
|                                                    | mA cm <sup>-2</sup> | mA cm <sup>-2</sup> |
| CuCo <sub>2</sub> S <sub>4</sub>                   | 18.3                | 13.7                |
| FeS <sub>2</sub> /CoFe <sub>2</sub> O <sub>4</sub> | 16.1                | 11.01               |
| CuS/CuFeS <sub>2</sub>                             | 13.7                | 6.7                 |

### References

1. M. Chauhan, K. P. Reddy, C. S. Gopinath and S. Deka, *ACS Catal.*, 2017, **7**, 5871-5879.
2. Q. Li and S. Sun, *Nano Energy*, 2016, **29**, 178-197.
3. D. Voiry, J. Yang and M. Chhowalla, *Adv. Mater.*, 2016, **28**, 6197-6206.
4. T. Wang, H. Xie, M. Chen, A. D'Aloia, J. Cho, G. Wu and Q. Li, *Nano Energy*, 2017, **42**, 69-89.
5. Q. Lu, Y. Yu, Q. Ma, B. Chen and H. Zhang, *Adv. Mater.*, 2016, **28**, 1917-1933.
6. Y. P. Zhu, C. Guo, Y. Zheng and S. Z. Qiao, *Acc. Chem. Res.*, 2017, **50**, 915-923.
7. A. Sivanantham, P. Ganesan and S. Shanmugam, *Adv. Funct. Mater.*, 2016, **26**, 4661-4672.

8. P. Cai, J. Huang, J. Chen and Z. Wen, *Angew. Chem. Int. Ed.*, 2017, **56**, 4858-4861.
9. J. Bai, T. Meng, D. Guo, S. Wang, B. Mao and M. Cao, *ACS Appl. Mater. Interfaces*, 2018, **10**, 1678-1689.
10. S. Deng, Y. Zhong, Y. Zeng, Y. Wang, X. Wang, X. Lu, X. Xia and J. Tu, *Adv. Sci.*, 2018, **5**, 1700772.
11. H. Wang, J. Tang, Y. Li, H. Chu, Y. Ge, R. Baines, P. Dong, P. M. Ajayan, J. Shen and M. Ye, *J. Mater. Chem. A*, 2018, **6**, 19417-19424.
12. H. Li, Z. Guo and X. Wang, *J. Mater. Chem. A*, 2017, **5**, 21353-21361.
13. J. Wang, H. X. Zhong, Z. L. Wang, F. L. Meng and X. B. Zhang, *ACS Nano*, 2016, **10**, 2342-2348.
14. L. L. Feng, G. Yu, Y. Wu, G. D. Li, H. Li, Y. Sun, T. Asefa, W. Chen and X. Zou, *J. Am. Chem. Soc.*, 2015, **137**, 14023-14026.
15. M. Fan, L. Zhang, K. Li, J. Liu, Y. Zheng, L. Zhang, S. Song and Z.-A. Qiao, *ACS Appl. Nano Mater.*, 2019, **2**, 3889-3896.
16. F. O.-T. Agyapong-Fordjour, S. Oh, J. Lee, S. Chae, K. H. Choi, S. H. Choi, S. Boandoh, W. Yang, J. Huh, K. K. Kim and J.-Y. Choi, *ACS Appl. Energy Mater.*, 2019, **2**, 5785-5792.
17. L. Wen, J. Yu, C. Xing, D. Liu, X. Lyu, W. Cai and X. Li, *Nanoscale*, 2019, **11**, 4198-4203.
18. H. Du, L. Xia, S. Zhu, F. Qu and F. Qu, *Chem. Commun.*, 2018, **54**, 2894-2897.
19. M. Li, Y. Qian, J. Du, H. Wu, L. Zhang, G. Li, K. Li, W. Wang and D. J. Kang, *ACS Sustainable Chem. Eng.*, 2019, **7**, 14016-14022.
20. H. Liu, X. Ma, Y. Rao, Y. Liu, J. Liu, L. Wang and M. Wu, *ACS Appl. Mater. Interfaces*, 2018, **10**, 10890-10897.
21. D. Liu, Q. Lu, Y. Luo, X. Sun and A. M. Asiri, *Nanoscale*, 2015, **7**, 15122-15126.
22. X. Ma, W. Zhang, Y. Deng, C. Zhong, W. Hu and X. Han, *Nanoscale*, 2018, **10**, 4816-4824.
23. Z. Liu, H. Tan, J. Xin, J. Duan, X. Su, P. Hao, J. Xie, J. Zhan, J. Zhang, J. J. Wang and H. Liu, *ACS Appl. Mater. Interfaces*, 2018, **10**, 3699-3706.
24. Y. Yang, K. Zhang, H. Lin, X. Li, H. C. Chan, L. Yang and Q. Gao, *ACS Catal.*, 2017, **7**, 2357-2366.
25. J. Tian, Q. Liu, A. M. Asiri and X. Sun, *J. Am. Chem. Soc.*, 2014, **136**, 7587-7590.

26. X. Wu, X. Han, X. Ma, W. Zhang, Y. Deng, C. Zhong and W. Hu, *ACS Appl. Mater. Interfaces*, 2017, **9**, 12574-12583.
27. J. Liu, J. Wang, B. Zhang, Y. Ruan, L. Lv, X. Ji, K. Xu, L. Miao and J. Jiang, *ACS Appl. Mater. Interfaces*, 2017, **9**, 15364-15372.
28. Y. Hou, M. R. Lohe, J. Zhang, S. Liu, X. Zhuang and X. Feng, *Energy Environ. Sci.*, 2016, **9**, 478-483.
29. L.-A. Stern, L. Feng, F. Song and X. Hu, *Energy Environ. Sci.*, 2015, **8**, 2347-2351.
30. P. F. Liu, S. Yang, B. Zhang and H. G. Yang, *ACS Appl. Mater. Interfaces*, 2016, **8**, 34474-34481.
31. X. Zhu, C. Tang, H.-F. Wang, B.-Q. Li, Q. Zhang, C. Li, C. Yang and F. Wei, *J. Mater. Chem. A*, 2016, **4**, 7245-7250.
32. A.-L. Wang, H. Xu and G.-R. Li, *ACS Energy Lett.*, 2016, **1**, 445-453.
33. W. Zhu, X. Yue, W. Zhang, S. Yu, Y. Zhang, J. Wang and J. Wang, *Chem. Commun.*, 2016, **52**, 1486-1489.
34. J. Shi, J. Hu, Y. Luo, X. Sun and A. M. Asiri, *Catal. Sci. Technol.*, 2015, **5**, 4954-4958.
35. J. Li, Y. Wang, T. Zhou, H. Zhang, X. Sun, J. Tang, L. Zhang, A. M. Al-Enizi, Z. Yang and G. Zheng, *J. Am. Chem. Soc.*, 2015, **137**, 14305-14312.
36. M. Gong, W. Zhou, M. C. Tsai, J. Zhou, M. Guan, M. C. Lin, B. Zhang, Y. Hu, D. Y. Wang, J. Yang, S. J. Pennycook, B. J. Hwang and H. Dai, *Nat. Commun.*, 2014, **5**, 4695.
37. H. Wang, H. W. Lee, Y. Deng, Z. Lu, P. C. Hsu, Y. Liu, D. Lin and Y. Cui, *Nat. Commun.*, 2015, **6**, 7261.
